# Supplementary material for: The Acceptability and Preference of Vaginal Self-sampling for Human Papillomavirus (HPV) Testing among a Multi-ethnic Asian Female Population
Source: Oxford University Press journal article supplement (doi:10.1158/1940-6207.capr-20-0280), 2020-09-11
Supplement: 19406207capr200280-sup-244123_2_supp_6504508_qf7qdr.docx [file 19406207capr200280-sup-244123_2_supp_6504508_qf7qdr.docx]

**Table S1**. Reasons for not doing a Pap test (n= 160)

| **Reasons** | **N (%)** |
| --- | --- |
| Not convenient | 77 (48.1) |
| Fear of pain or discomfort | 71 (44.4) |
| Embarrassed to be examined by physician | 61 (38.1) |
| Lack of awareness | 49 (30.6) |
| Fear of an abnormal result | 30 (18.8) |
| Others | 16 (10.0) |

Note: Participants might have selected multiple reasons for not doing a Pap test.
